# Supplementary material
Source: PubMed Central journal article supplement (PMC9186397)
Supplement: ana-34-333-s001.pdf [file ana-34-333-s001.pdf]

## **SURVEY QUESTIONS**

### **Demographics**

1. To what age group do you belong
  - a. 18-24
  - b. 25-34
  - c. 35-44
  - d. 45-54
  - e. 55-65
  - f. 65+
2. What gender are you ?
  - a. Male
  - b. Female
  - c. Other
  - d. Prefer not to say
3. What is your occupation ?
  - a. Consultant
  - b. Fellow/Registrar
  - c. SHO
  - d. Nurse
  - e. Health Care Assistant
  - f. Operating Department Practitioner
  - g. Physiotherapist
  - h. Other
4. In which clinical department do you usually work ?
  - a. Anaesthetics
  - b. Operating theatres
  - c. Intensive Care Unit
  - d. Neurosurgery
  - e. Neurology
  - f. Physiotherapy
  - g. Nursing
  - h. Other
5. What is your ethnic background ?
  - a. White
  - b. Black/Black British
  - c. Asian /Asian British
  - d. Mixed Race
  - e. Prefer Not to say
  - f. Any other ethnic background

### ***Working hours and redeployment***

6. During the pandemic I have been working more than my contracted hours?  
Yes            No
7. If you answered yes to above, please indicate how many hours over (approximately) per week:
  - a. 0-5 hours
  - b. 5-10 hours
  - c. 10-15 hours

- d. 15-20 hours
  - e. > 20 hours
  - f. Not applicable
8. I am working more anti-social hours than before COVID-19
- a. Strongly agree
  - b. Agree
  - c. Neither agree nor disagree
  - d. Disagree
  - e. Strongly disagree
9. Were you deployed to another clinical department?
- Yes                  No
10. If yes to above, which department?
- a. Intensive Care Unit
  - b. Operating theatres
  - c. Surgical Wards
  - d. Medical Wards
  - e. Hyper-acute Stroke Unit
  - f. Radiology
  - g. Not applicable
  - h. Other
11. How prepared did you feel to deliver care in your new clinical department?
- a. Completely unprepared
  - b. Somewhat prepared
  - c. Neither unprepared nor prepared
  - d. Somewhat prepared
  - e. Very prepared
  - f. Not applicable

***Experience of risk:***

12. I feel that my personal health is at risk
- a. None of the time
  - b. Rarely
  - c. Some of the time
  - d. Often
  - e. All of the time
13. I am worried about the potential risks to my family, loved ones or others
- f. None of the time
  - g. Rarely
  - h. Some of the time
  - i. Often
  - j. All of the time
14. I have witnessed loved ones, friends or colleagues become ill
- Yes                  No                  Other (please specify)

***Experience of fatigue:***

15. I get enough hours of sleep each day
  - a. None of the time
  - b. Rarely
  - c. Some of the time
  - d. Often
  - e. All of the time
16. I am able to unplug from my work when I am at home
  - a. None of the time
  - b. Rarely
  - c. Some of the time
  - d. Often
  - e. All of the time
17. Have you had any of the following due to work place fatigue?
  - a. Clinical error
  - b. Administrative error
  - c. Personal injury
  - d. Poor communication
  - e. Not applicable
  - f. Other
18. What level of work place fatigue have you experienced in the last 10 working days?  
(VAS: 0-10 with 0=none 10= constant)
19. In general I feel I am in charge of the current situation I am in
  - a. None of the time
  - b. Rarely
  - c. Some of the time
  - d. Often
  - e. All of the time
20. The work I do is worthwhile and meaningful
  - a. None of the time
  - b. Rarely
  - c. Some of the time
  - d. Often
  - e. All of the time
21. My colleagues are supportive and we are working well together during this time
  - a. None of the time
  - b. Rarely
  - c. Some of the time
  - d. Often
  - e. All of the time
